# Supplementary material
Source: publisher figshare collection journal article supplement (https://frontiersin.figshare.com/ndownloader/files/16935995)
Supplement: Supplementary file 1 [file 16935995]

# Supplementary Material

## 1 SUPPLEMENTARY TABLE

Table S1 present the forecast predictions for 2030 for the Brazilian Market.

**Table S1.** 2030 Forecast Predictions for Brazilian Market

| Chemical         | Imports      |                  | Exports     |                  |
|------------------|--------------|------------------|-------------|------------------|
|                  | Amount (kg)  | FOB Value (US\$) | Amount (kg) | FOB Value (US\$) |
| Acetaldehyde     | 19805.4      | 618863.1         | 20.7        | 22.6             |
| Acetic Acid      | 138339247.8  | 68896140.5       | 78245.6     | 60516.6          |
| Acetone          | 50882145.5   | 17599244.5       | 1623503.8   | 678842.7         |
| Benzoic Acid     | 4233409.8    | 6780132.3        | 10044.7     | 65807.0          |
| Formaldehyde     | 16078.3      | 69818.3          | 1128245.7   | 651714.0         |
| Formic Acid      | 27135557.5   | 35085359.2       | 2576.0      | 4206.3           |
| Methacrylic acid | 29095.9      | 392321.4         | 9391045.1   | 26965331.9       |
| Methanol         | 4168675256.5 | 721932475.3      | 1803.4      | 22107.5          |
| Oxalic Acid      | 3731503.1    | 3226070.9        | 9901.7      | 30657.4          |
| Polycarbonates   | 380880.2     | 1069540.0        | 156.9       | 148.1            |
| Propanol         | 36218144.6   | 16125640.7       | 18166.0     | 68271.9          |
| Salicylic Acid   | 228758.9     | 674082.0         | 1046770.0   | 1655972.9        |
| Urea             | 8573996684.6 | 1974672265.2     | 21535370.4  | 7575448.6        |
